# Supplementary material for: Pterostilbene Attenuates Fructose-Induced Myocardial Fibrosis by Inhibiting ROS-Driven Pitx2c/miR-15b Pathway
Source: Hindawi journal article supplement (doi:10.1155/2019/1243215), 2019-12-04

**Pterostilbene attenuates fructose-induced myocardial fibrosis by inhibiting ROS-driven  
Pitx2c/miR-15b pathway**

**Pterostilbene protects from myocardial fibrosis**

Lin-Lin Kang<sup>1</sup>, Dong-Mei Zhang<sup>1</sup>, Rui-Qing Jiao<sup>1</sup>, Shu-Man Pan<sup>1</sup>, Xiao-Juan Zhao<sup>1</sup>, Yan-Jing Zheng<sup>1</sup>,  
Tian-Yu Chen<sup>1,2</sup>, and Ling-Dong Kong<sup>1</sup>

<sup>1</sup>State Key Laboratory of Pharmaceutical Biotechnology, School of Life Science, Nanjing University,  
Nanjing, P. R. China

<sup>2</sup>State Key Laboratory Cultivation Base for TCM Quality and Efficacy, Nanjing University of Chinese  
Medicine, Nanjing 210023, P. R. China

Correspondence and requests for materials should be addressed to Dr. Ling-Dong Kong (Tel. and fax:  
+86-25-83594691; email: kongld@nju.edu.cn)

The authors declare no conflict of interest.

# Supplementary Table

**Table S1. Aberrantly expressed miRNAs in fructose-vehicle animal group revealed by a microarray scan.**

| Name                   | Fold change                              | <i>p</i> -value       | Name             | Fold change | <i>p</i> -value |
|------------------------|------------------------------------------|-----------------------|------------------|-------------|-----------------|
| <b>Positive Genes:</b> | <b>Fold change <math>\geq 1.5</math></b> |                       | rno-miR-380-5p   | 0.565473    | 0.167421        |
| rno-miR-99b-3p         | 2.063641                                 | 0.481478              | rno-miR-15b-5p   | 0.564152    | 0.050515        |
| rno-miR-493-5p         | 1.97534                                  | 0.101411              | rno-miR-30b-3p   | 0.563457    | 0.308952        |
| rno-let-7a-5p          | 1.849243                                 | 0.177056              | rno-miR-337-5p   | 0.557398    | 0.258185        |
| rno-miR-465-5p         | 1.772754                                 | 0.121411              | rno-miR-448-5p   | 0.553514    | 0.260916        |
| rno-miR-7b             | 1.742648                                 | 0.154412              | rno-miR-320-3p   | 0.542009    | 0.33094         |
| rno-miR-9b-5p          | 1.728478                                 | 0.16723               | rno-miR-142-5p   | 0.540299    | 0.11335         |
| rno-miR-743a-3p        | 1.720878                                 | 0.192757              | rno-miR-1843a-5p | 0.538865    | 0.364358        |
| rno-miR-187-5p         | 1.701578                                 | 0.338445              | rno-miR-98-3p    | 0.5333      | 0.069132        |
| rno-miR-181b-5p        | 1.681387                                 | 0.196039              | rno-miR-181c-3p  | 0.52443     | 0.209769        |
| rno-miR-433-5p         | 1.674082                                 | 0.068219              | rno-miR-3591     | 0.523418    | 0.295768        |
| rno-miR-29b-3p         | 1.642932                                 | 0.184706              | rno-miR-20a-5p   | 0.497283    | 0.065369        |
| rno-miR-381-3p         | 1.62233                                  | 0.271121              | rno-miR-758-3p   | 0.4873      | 0.286007        |
| rno-miR-365-3p         | 1.605889                                 | 0.19909               | rno-miR-339-5p   | 0.487154    | 0.116773        |
| rno-miR-347            | 1.572813                                 | 0.130232              | rno-miR-150-5p   | 0.482113    | 0.368901        |
| rno-miR-598-3p         | 1.531271                                 | 0.330219              | rno-miR-370-3p   | 0.474309    | 0.21584         |
| rno-miR-352            | 1.523969                                 | 0.193969              | rno-miR-935      | 0.449092    | 0.377685        |
| rno-miR-136-5p         | 1.522933                                 | 0.189312              | rno-miR-212-5p   | 0.448323    | 0.297019        |
| rno-miR-324-3p         | 1.506851                                 | 0.257809              | rno-miR-1224     | 0.432602    | 0.320107        |
| rno-miR-30a-5p         | 1.504091                                 | 0.202055              | rno-miR-331-5p   | 0.416514    | 0.339699        |
| <b>Name</b>            | <b>Fold change</b>                       | <b><i>p</i>-value</b> | rno-miR-223-3p   | 0.40993     | 0.032337        |
| <b>Negative Genes:</b> | <b>Fold change <math>\leq 0.6</math></b> |                       | rno-let-7f-1-3p  | 0.398882    | 0.217077        |
| rno-miR-674-3p         | 0.591335                                 | 0.203443              | rno-miR-155-3p   | 0.301484    | 0.288519        |
| rno-let-7e-3p          | 0.577555                                 | 0.083248              |                  |             |                 |

Herein, t-test analysis generated a list of miRNAs that were differentially expressed in the FM (normal control animal group) samples compared to the FC (fructose-vehicle animal group) samples (n=3).

**Table S2. primer, siRNA and miRNA sequences.**

| ID                    | Sense primer (5'→ 3')                                                   | Antisense primer (5'→ 3')                                               |
|-----------------------|-------------------------------------------------------------------------|-------------------------------------------------------------------------|
| Pitx2c                | GACTCCTCCAAACATAGACT                                                    | GATTTCTTCGCGTGTGGAC                                                     |
| p53                   | GGGAATGGGTGGTAGTT                                                       | AGAGTGGAGGAAATGGGT                                                      |
| GAPDH                 | ACAACTTTGGTATCGTGGAAGG                                                  | GCCATCACGCCACAGTTTC                                                     |
| TGF-β1                | CTAATGGTGGACCGCAACAAC                                                   | CACTGCTTCCCgaatGTCTGA                                                   |
| CTGF                  | ACCGCACAGAACCACCACT                                                     | CCCTTACTCCCTGGCTTTACGC                                                  |
| miR-15b-5p            | GCTAGCAGCACATCATGG                                                      | CAGCCACAAAAGAGCACAAT                                                    |
| miR-15b-Stem-loop     | CCTGTTGTCTCCAGCCACAAAAGAGCACAATATTTTCAGGAGACAACA<br>GGTGTA              |                                                                         |
| U6                    | CTCGCTTCGGCAGCACA                                                       | AACGCTTCACGAATTTGCGT                                                    |
| URP                   | TGGTGTCTGAGTCG                                                          |                                                                         |
| <i>Pitx2c</i> siRNA   | CCGGGUUUGGUUCAAGAAUTT<br>UCAACUCUAUGAACGUCAATT<br>GCCUGAAUAACUUGAACAATT | AUUCUUGAACCAAACCCGGTT<br>UUGACGUUCAUAGAGUUGATT<br>UUGUUCAAGUUAUUCAGGCTT |
| <i>p53</i> siRNA      | CCUGUGCAGUUGUGGGUCATT                                                   | UGACCCACAACUGCACAGGTT                                                   |
| <i>TGF-β1</i> siRNA   | CUGAGUGGCUGUCUUUUGATT                                                   | UCAAAGACAGCCACUCAGTT                                                    |
| <i>CTGF</i> siRNA     | ACCUAGAGGAAAACAUUAATT                                                   | UUAAGUUUCCUCUAGGUTT                                                     |
| miR-15b mimic         | UAGCAGCACAUCAUGGUUUACA                                                  | UAAACCAUGAUGUGCUGCUAUU                                                  |
| Negative control      | UUCUCCGAACGUGUCACGUTT                                                   | ACGUGACACGUUCGGAGAATT                                                   |
| miR-15b inhibitor     | UGUAAACCAUGAUGUGCUGCUA                                                  |                                                                         |
| MicroRNA inhibitor NC | CAGUACUUUUGUGUAGUACAA                                                   |                                                                         |

**Table S3. Pitx2c gene sequences inserted in the plasmid expression vector pEX1-Pitx2c were listed as follows.**

| ID        | Pitx2c                                                                                                                                                                                                                                                                                                                                                                                                                                                                                                                                                                                                                                                                                                                                                                                                                                                                                                                                                                                                                                                                                                                                            |
|-----------|---------------------------------------------------------------------------------------------------------------------------------------------------------------------------------------------------------------------------------------------------------------------------------------------------------------------------------------------------------------------------------------------------------------------------------------------------------------------------------------------------------------------------------------------------------------------------------------------------------------------------------------------------------------------------------------------------------------------------------------------------------------------------------------------------------------------------------------------------------------------------------------------------------------------------------------------------------------------------------------------------------------------------------------------------------------------------------------------------------------------------------------------------|
| sequences | <p>ATGAACTGCATGAAAGGCCCGCTGCCCTTGGAGCACCGAGCAGCCG<br/> GGACTAAGCTGTCGGCCGCTTCCTCACCCCTTCTGTCACCATACCCAG<br/> GCGTTAGCCATGGCTTCGGTCCTAGCTCCTGGTCAGCCCCGCTCCCTG<br/> GACGCCTCCAAACATAGACTGGAGGTGCATACAATCTCCGATACGTC<br/> CAGCCCTGAAGTCGCAGAGAAAGATAAGGGCCAGCAGGGAAAGAAT<br/> GAGGATGTGGGCGCAGAGGACCCGTCCAAGAAGAAGCGGCAACGC<br/> CGGCAGAGGACTCACTTTACTAGTCAGCAGCTCCAGGAGCTGGAAG<br/> CCACTTTCCAGAGAAACCGCTACCCAGACATGTCCACTCGCGAAGAA<br/> ATCGCCGTGTGGACCAACCTTACGGAAGCCCGAGTCCGGGTTTGGTT<br/> CAAGAATCGCCGGGCCAAATGGAGAAAGCGGGAGCGCAACCAGCA<br/> GGCCGAGCTGTGTAAGAATGGCTTCGGGCCGCAGTTCAATGGGCTCA<br/> TGCAGCCGTACGATGACATGTACCCCGGCTACTCGTACAACAATTGG<br/> GCTGCCAAGGGCCTCACGTCAGCGTCTCTGTCCACCAAGAGCTTCCC<br/> CTTCTTCAACTCTATGAACGTCAATCCCCTATCCTCCCAGAGCATGTTT<br/> TCCCCGCCCAACTCCATCTCATCCATGAGTATGTCGTCCAGCATGGTG<br/> CCGTCCGCGGTGACCGGCGTCCCGGGCTCCAGCCTCAATAGCCTGAA<br/> TAACTTGAACAACCTGAGCAGCCCGTCGCTGAATTCCGCGGTGCCCA<br/> CGCCCGCCTGTCCTTACGCGCCGCCGACTCCTCCGTACGTTTATAGGG<br/> ACACATGTAACCTCGAGCCTGGCCAGTCTGAGACTAAAAGCAAAGCA<br/> ACACTCCAGCTTCGGCTACGCCAGCGTGCAGAACCCGGCCTCCAACC<br/> TGAGCGCTTGCCAGTATGCGGTTCGACCGGCCGGTGTGA</p> |

**Table S4. The miR-15b promoter sequences containing the Pitx2c binding sites were amplified by qRT-PCR using the following primers.**

| ID        | Sense primer (5'→ 3') | Antisense primer (5'→ 3') |
|-----------|-----------------------|---------------------------|
| miR-15b.1 | TTACTCACTAATCCCGGTTTC | TTGCGGAGCATCAGTTAT        |
| miR-15b.2 | ATGGTTGTCAGCTTATGGTC  | CTGAAACTAATGGAACGGATT     |
| miR-15b.3 | CATGGGATTGACTTAGACCA  | ATTCACCAAACAGAACAACG      |
| GAPDH     | ACGTAGCTCAGGCCTCAAGA  | GCGGGCTCAATTTATAGAAAC     |

## Supplementary Figures Legends

**Figure S1. The transfection efficiency of p53 gene silencing in H9c2 cells.** P53 mRNA levels were assayed in 50 nM *p53* siRNA- and negative control-transfected H9c2 cells (n=6), respectively. Data are expressed as the mean  $\pm$  S.E.M. <sup>#</sup>*P* < 0.05 vs negative control cell group.

**Figure S2. The transfection efficiency of CTGF gene silencing in H9c2 cells.** CTGF mRNA levels were assayed in 50 nM *CTGF* siRNA- and negative control-transfected H9c2 cells (n=6), respectively. Data are expressed as the mean  $\pm$  S.E.M. <sup>#</sup>*P* < 0.05 vs negative control cell group.

**Figure S3. The transfection efficiency of TGF- $\beta$ 1 gene silencing in H9c2 cells.** TGF- $\beta$ 1 mRNA levels were assayed in 50 nM *TGF- $\beta$ 1* siRNA- and negative control-transfected H9c2 cells (n=6), respectively. Data are expressed as the mean  $\pm$  S.E.M. <sup>#</sup>*P* < 0.05 vs negative control cell group.

**Figure S4. The transfection efficiency of miR-15b gene overexpression in H9c2 cells.** MiR-15b expression levels were assayed in 50 nM miR-15b mimic- and negative control-transfected H9c2 cells (n=6), respectively. Data are expressed as the mean  $\pm$  S.E.M. <sup>###</sup>*P* < 0.001 vs negative control cell group.

**Figure S5. The transfection efficiency of miR-15b gene silencing in H9c2 cells.** MiR-15b expression levels were assayed in 50 nM miR-15b inhibitor- and microRNA inhibitor NC-transfected H9c2 cells (n=6), respectively. Data are expressed as the mean  $\pm$  S.E.M. <sup>#</sup>*P* < 0.05 vs microRNA

inhibitor N.C cell group.

**Figure S6. The transfection efficiency of Pitx2c gene overexpression in H9c2 cells.** Pitx2c mRNA levels were assayed in pEX1-Pitx2c plasmid- and pEX1-Control plasmid -transfected H9c2 cells (n=6), respectively. Data are expressed as the mean  $\pm$  S.E.M.  $^{###}P < 0.001$  vs pEX1-Control cell group.

**Figure S7. The transfection efficiency of Pitx2c gene silencing in H9c2 cells.** Pitx2c mRNA levels were assayed in *Pitx2c* siRNA- and negative control-transfected H9c2 cells (n=6), respectively. Data are expressed as the mean  $\pm$  S.E.M.  $^{\#}P < 0.05$  vs negative control cell group.

**Figure S8. RNA polymerase II occupancy in the GAPDH promoter in H9c2 cells by ChIP-qRT-PCR assays.** There was an observed enrichment in RNA polymerase II binding GAPDH promoter (n=3) after pEX1-Pitx2c plasmid-transfected H9c2 cells. Data are expressed as the mean  $\pm$  S.E.M.  $^{***}P < 0.001$  vs IgG-negative control group.

**Figure S9. Effects of pterostilbene and allopurinol on fructose-induced alteration of cellular p-p53 and TGF- $\beta$ 1/Smads signaling in NAC pretreated-H9c2 cells.** Cellular p-p53 (A), TGF- $\beta$ 1 (B), p-Smad2/3 (C-D) and Smad4 (E) protein levels were determined in NAC-pretreated H9c2 cells co-incubated with 5 mM fructose, 10  $\mu$ M pterostilbene and 30  $\mu$ M allopurinol (n=6), respectively. Relative protein levels of p-p53 were normalized to p53, respectively. The relative protein levels of TGF- $\beta$ 1 and Smad4 were normalized to GAPDH, respectively (n=6). Relative protein levels of

p-Smad2/3 were normalized to Smad2/3, respectively (n=6). Data are expressed as the mean  $\pm$  S.E.M.

<sup>#</sup>*P* < 0.05, <sup>##</sup>*P* < 0.01, <sup>###</sup>*P* < 0.001 vs normal cell control group; \**P* < 0.05, \*\**P* < 0.01, \*\*\**P* < 0.001 vs fructose-vehicle cell group, or fructose-vehicle + NAC control cell group.

**Figure S10. Effects of pterostilbene and allopurinol on fructose-induced alteration of cellular NADPH oxidase activity, ROS production and Pitx2c protein in p53 siRNA transfected-H9c2 cells.** Cellular NADPH oxidase activity (A), ROS production (B) and Pitx2c protein levels (C) were determined in *p53* siRNA-transfected H9c2 cells co-incubated with 5 mM fructose, 10  $\mu$ M pterostilbene and 30  $\mu$ M allopurinol (n=6). Relative protein levels of Pitx2c were normalized to  $\beta$ -actin, respectively. Data are expressed as the mean  $\pm$  S.E.M. <sup>##</sup>*P* < 0.01 vs normal cell control group; \**P* < 0.05 vs fructose-vehicle cell group or fructose-vehicle + *p53* siRNA control cell group.

**Figure S11. Pterostilbene and allopurinol decrease TGF- $\beta$ 1-mediated CTGF expressions to inhibit downstream hypertrophic and fibrotic response-associated indicators ANP,  $\alpha$ -SMA and FSP-1 expressions in fructose-exposed H9c2 cells.** Cellular protein levels of ANP (A),  $\alpha$ -SMA (B) and FSP-1 (C) were determined in *CTGF* siRNA-transfected H9c2 cells co-incubated with 5 mM fructose, 10  $\mu$ M pterostilbene and 30  $\mu$ M allopurinol (n=6). Cellular protein levels of CTGF (D), ANP (E),  $\alpha$ -SMA (F) and FSP-1 (G) were determined in *TGF- $\beta$ 1* siRNA-transfected H9c2 cells co-incubated with 5 mM fructose, 10  $\mu$ M pterostilbene and 30  $\mu$ M allopurinol (n=6). Relative protein levels of CTGF, ANP and FSP-1 were normalized to  $\beta$ -actin, of  $\alpha$ -SMA were normalized to GAPDH, respectively. Data are expressed as the mean  $\pm$  S.E.M. <sup>#</sup>*P* < 0.05, <sup>##</sup>*P* < 0.01 vs normal cell control group; \**P* < 0.05, \*\**P* < 0.01 vs fructose-vehicle cell group or fructose-vehicle + *CTGF* siRNA or



*TGF-β1* siRNA control cell group.

**Figure S12. Effects of pterostilbene and allopurinol on fructose-induced alteration of cellular CTGF, ANP,  $\alpha$ -SMA and FSP-1 in NAC pretreated-, *Pitx2c* siRNA, miR-15b mimic, *p53* siRNA transfected-H9c2 cells.** Cellular CTGF, ANP,  $\alpha$ -SMA and FSP-1 protein levels were determined in NAC (A-D) pretreated-, *Pitx2c* siRNA (E-H), miR-15b mimic (I-L), *p53* siRNA (M-P)-transfected H9c2 cells co-incubated with 5 mM fructose, 10  $\mu$ M pterostilbene and 30  $\mu$ M allopurinol, respectively. Relative protein levels of CTGF, ANP and FSP-1 were normalized to  $\beta$ -actin, of  $\alpha$ -SMA were normalized to GAPDH, respectively. Data are expressed as the mean  $\pm$  S.E.M.  $^{\#}P < 0.05$ ,  $^{\#\#}P < 0.01$ ,  $^{\#\#\#}P < 0.001$  vs normal cell control group;  $^*P < 0.05$ ,  $^{**}P < 0.01$ ,  $^{***}P < 0.001$  vs fructose-vehicle cell group or fructose-vehicle + NAC or *Pitx2c* siRNA or miR-15b mimic or *p53* siRNA control cell group.

**Figure S13. Proposed scheme of the mechanisms underlying fructose-induced myocardial fibrosis, as well as the attenuation of pterostilbene and allopurinol.** High fructose triggers cardiac ROS to increase *Pitx2c* and then reduce miR-15b expression, this event up-regulates p-p53 to activate TGF- $\beta$ 1/Smads signaling in myocardial fibrosis. Pterostilbene and allopurinol with the reduction of ROS down-regulate *Pitx2c* to increase miR-15b expression, and then suppress p-p53-mediated TGF- $\beta$ 1/Smads signaling activation, resulting in the alleviation of fructose-induced myocardial fibrosis.

## Supplementary Figures

Figure S1

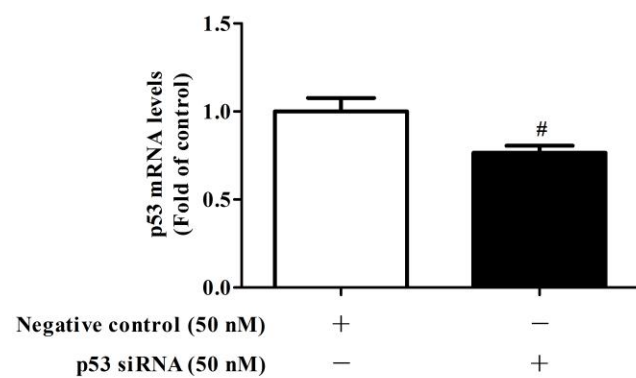

Figure S2

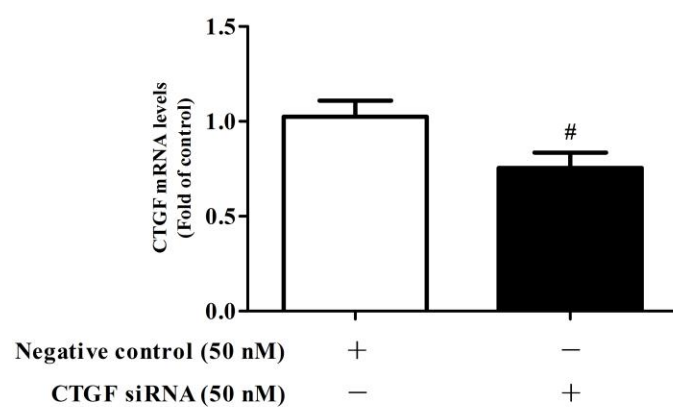

Figure S3

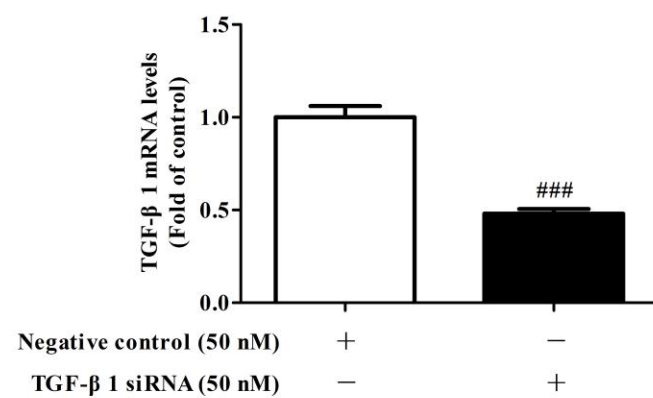

**Figure S4**

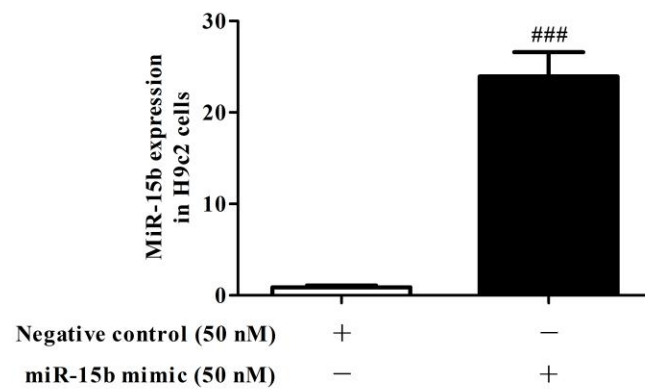

**Figure S5**

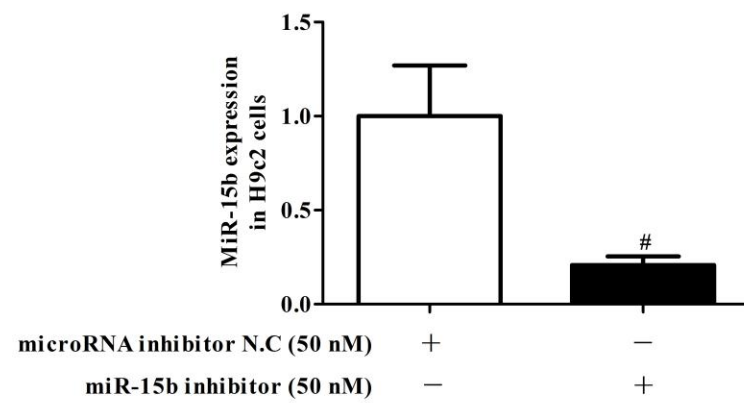

**Figure S6**

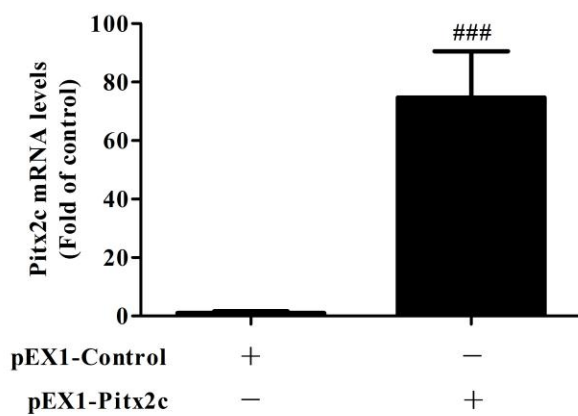

**Figure S7**

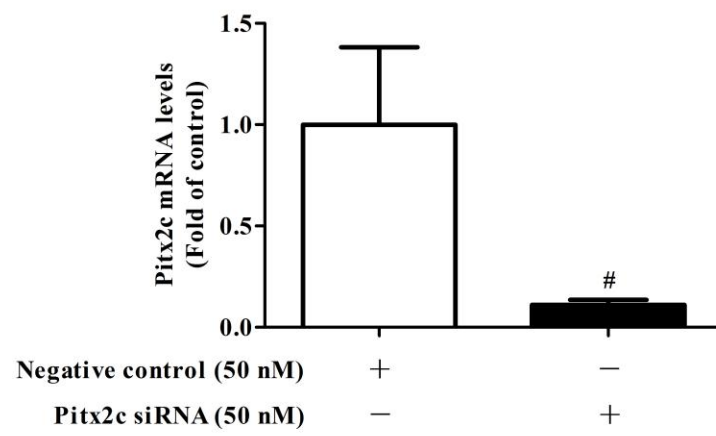

**Figure S8**

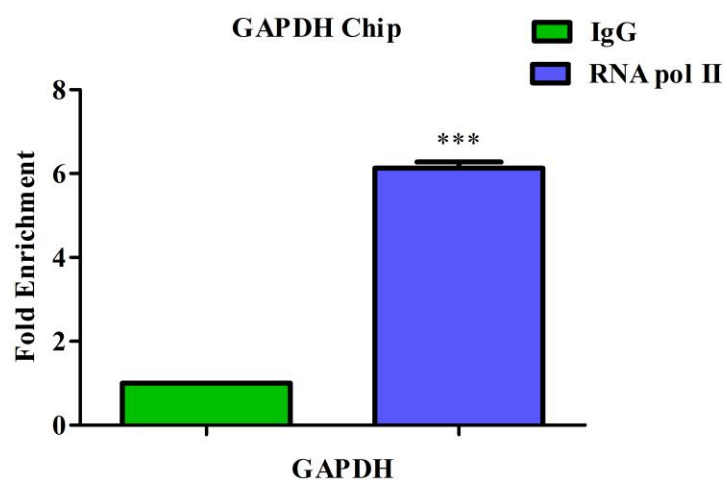

**Figure S9**

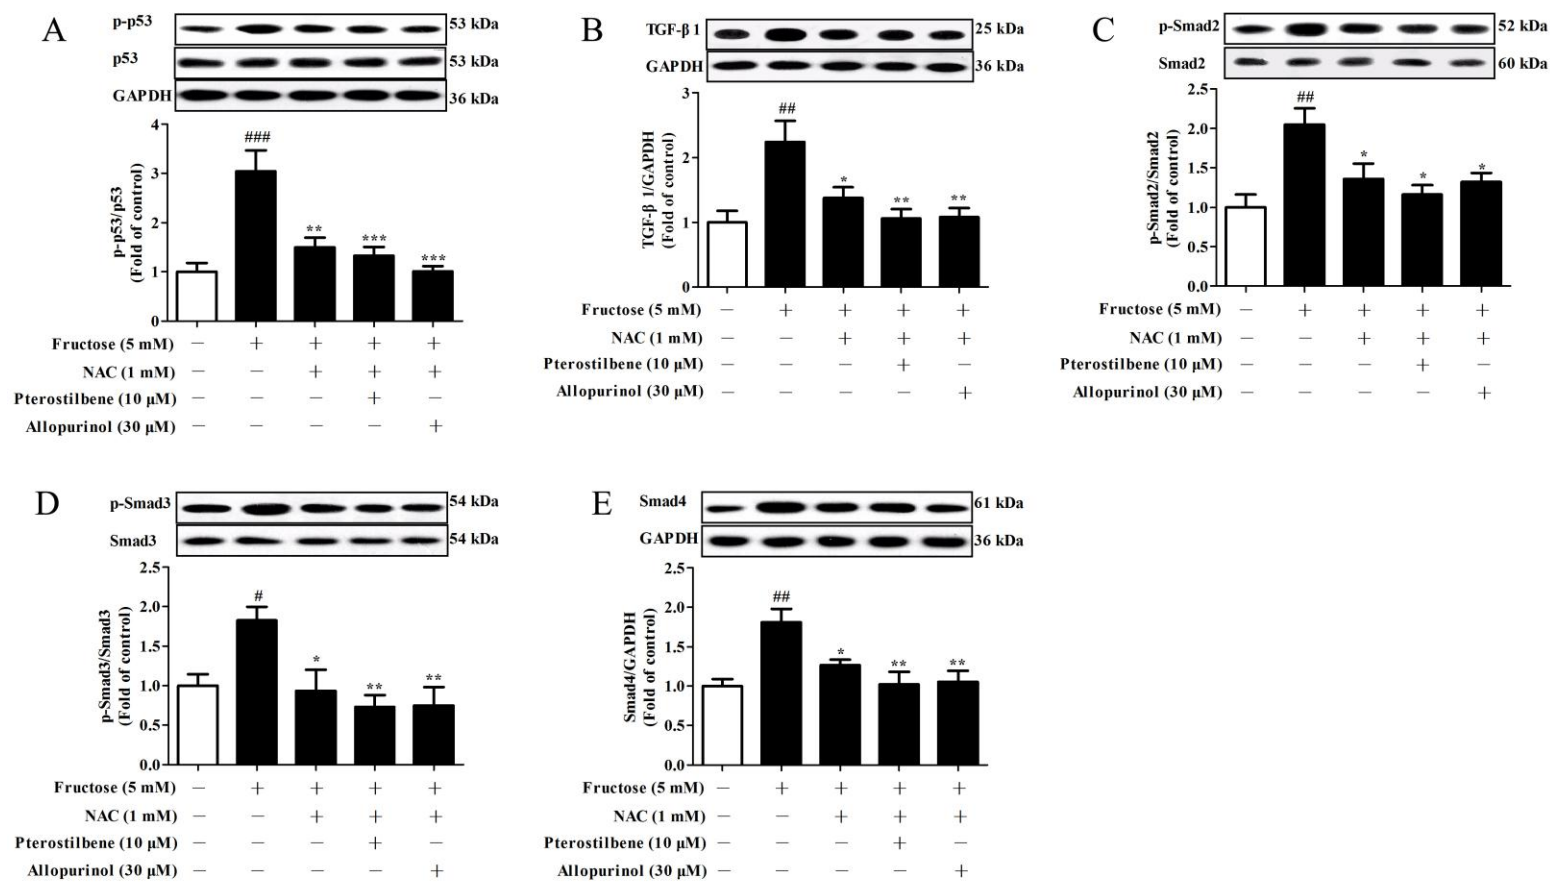

**Figure S10**

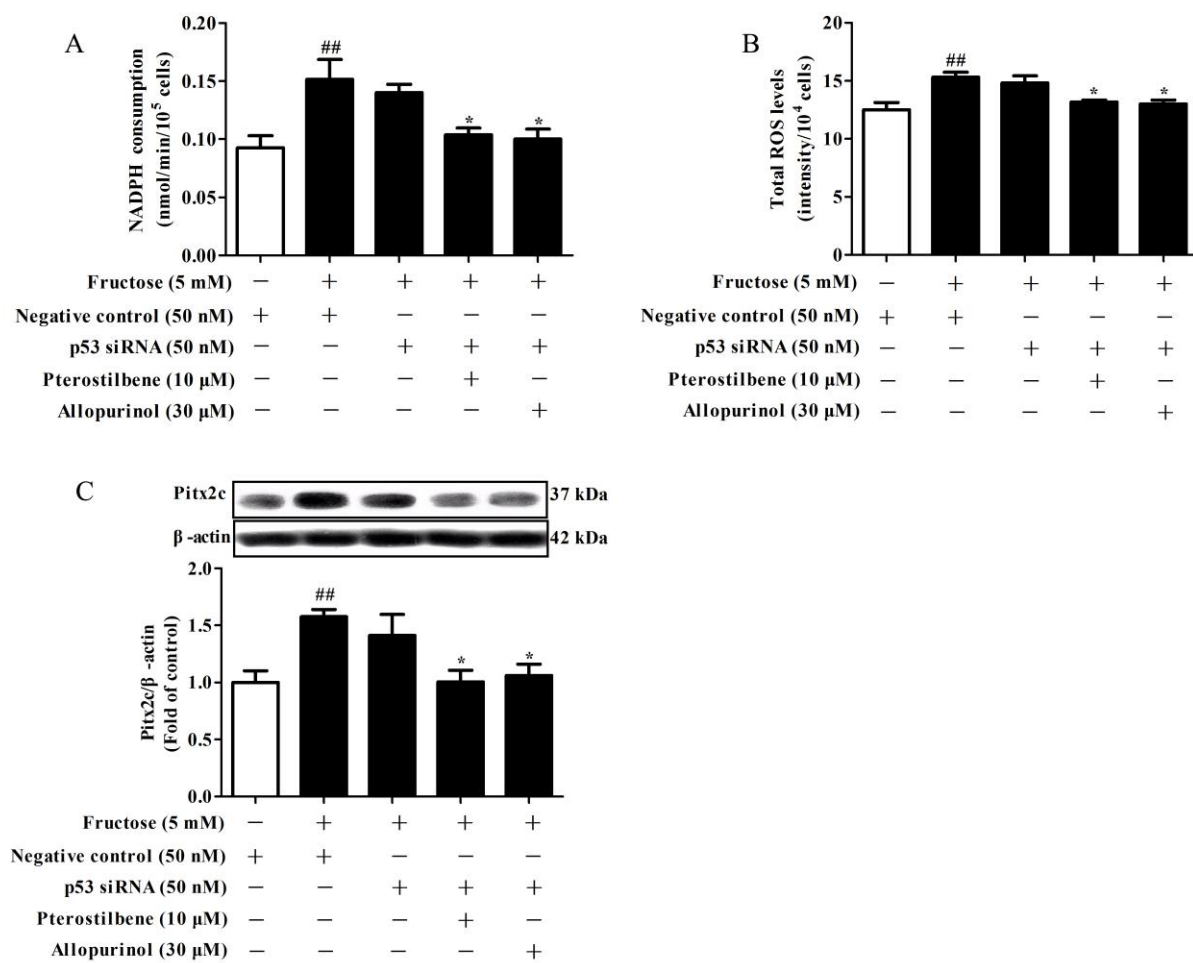

Figure S11

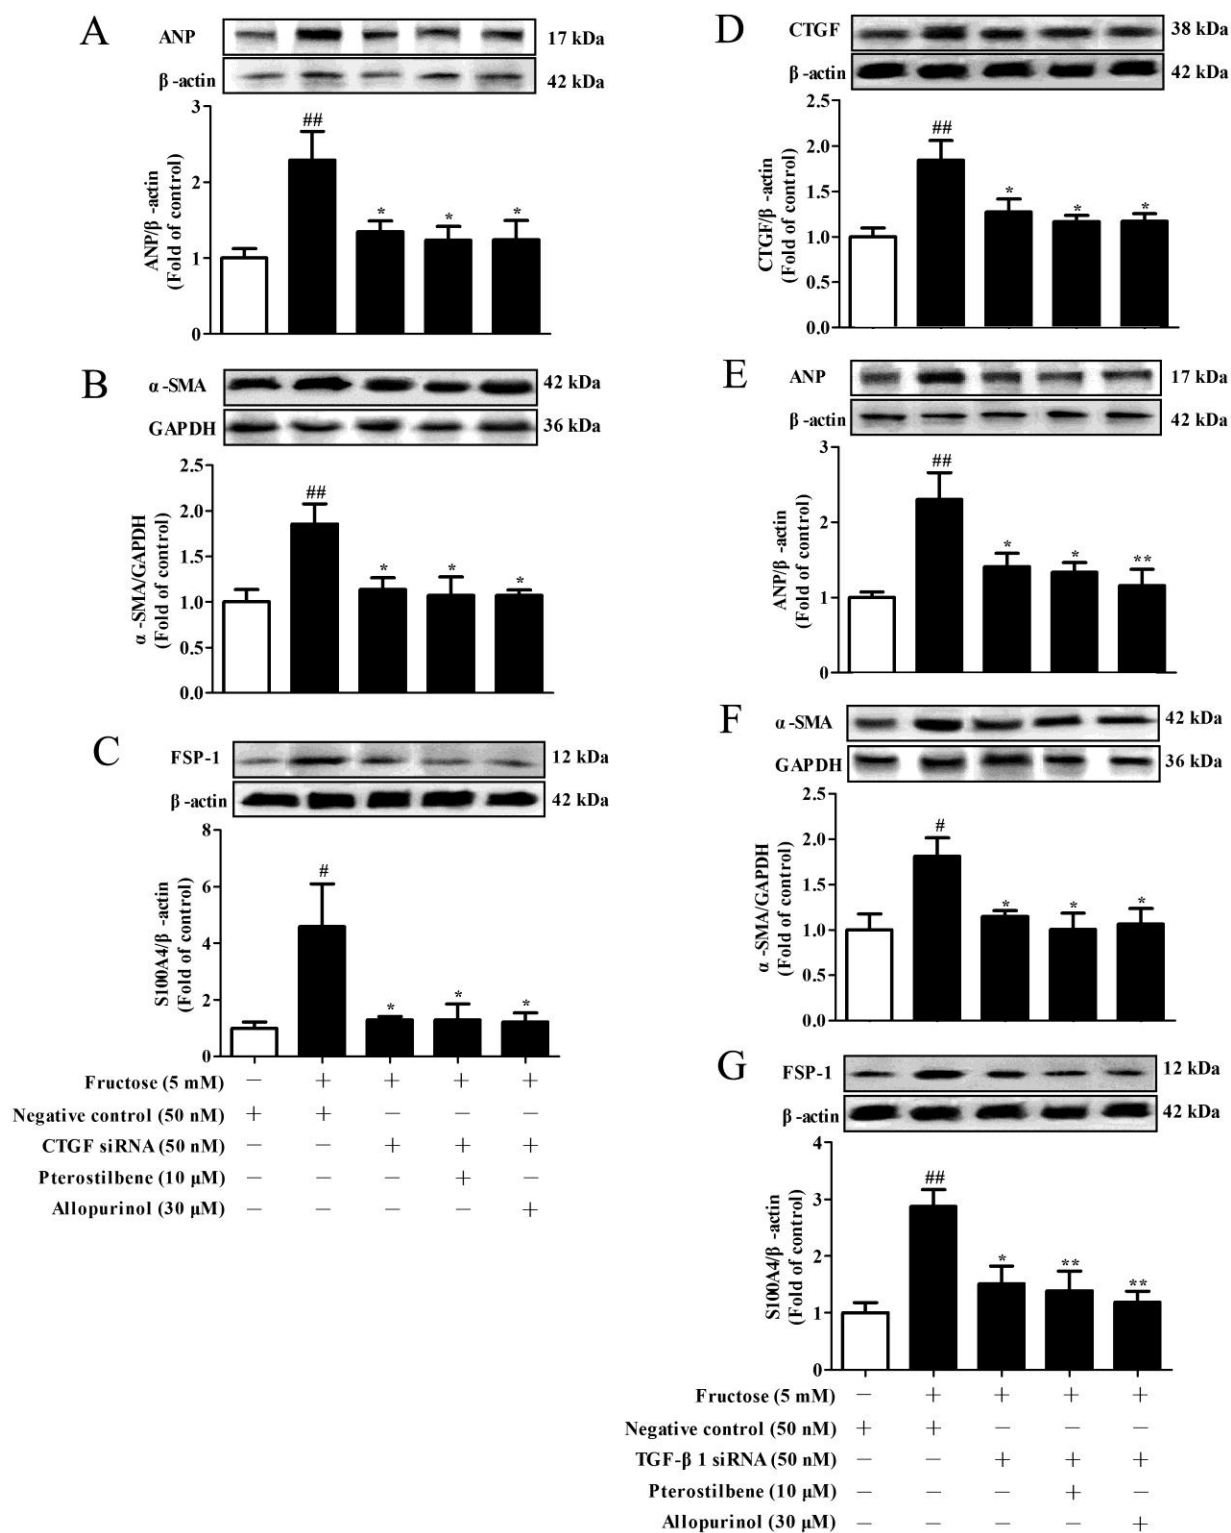

Figure S12

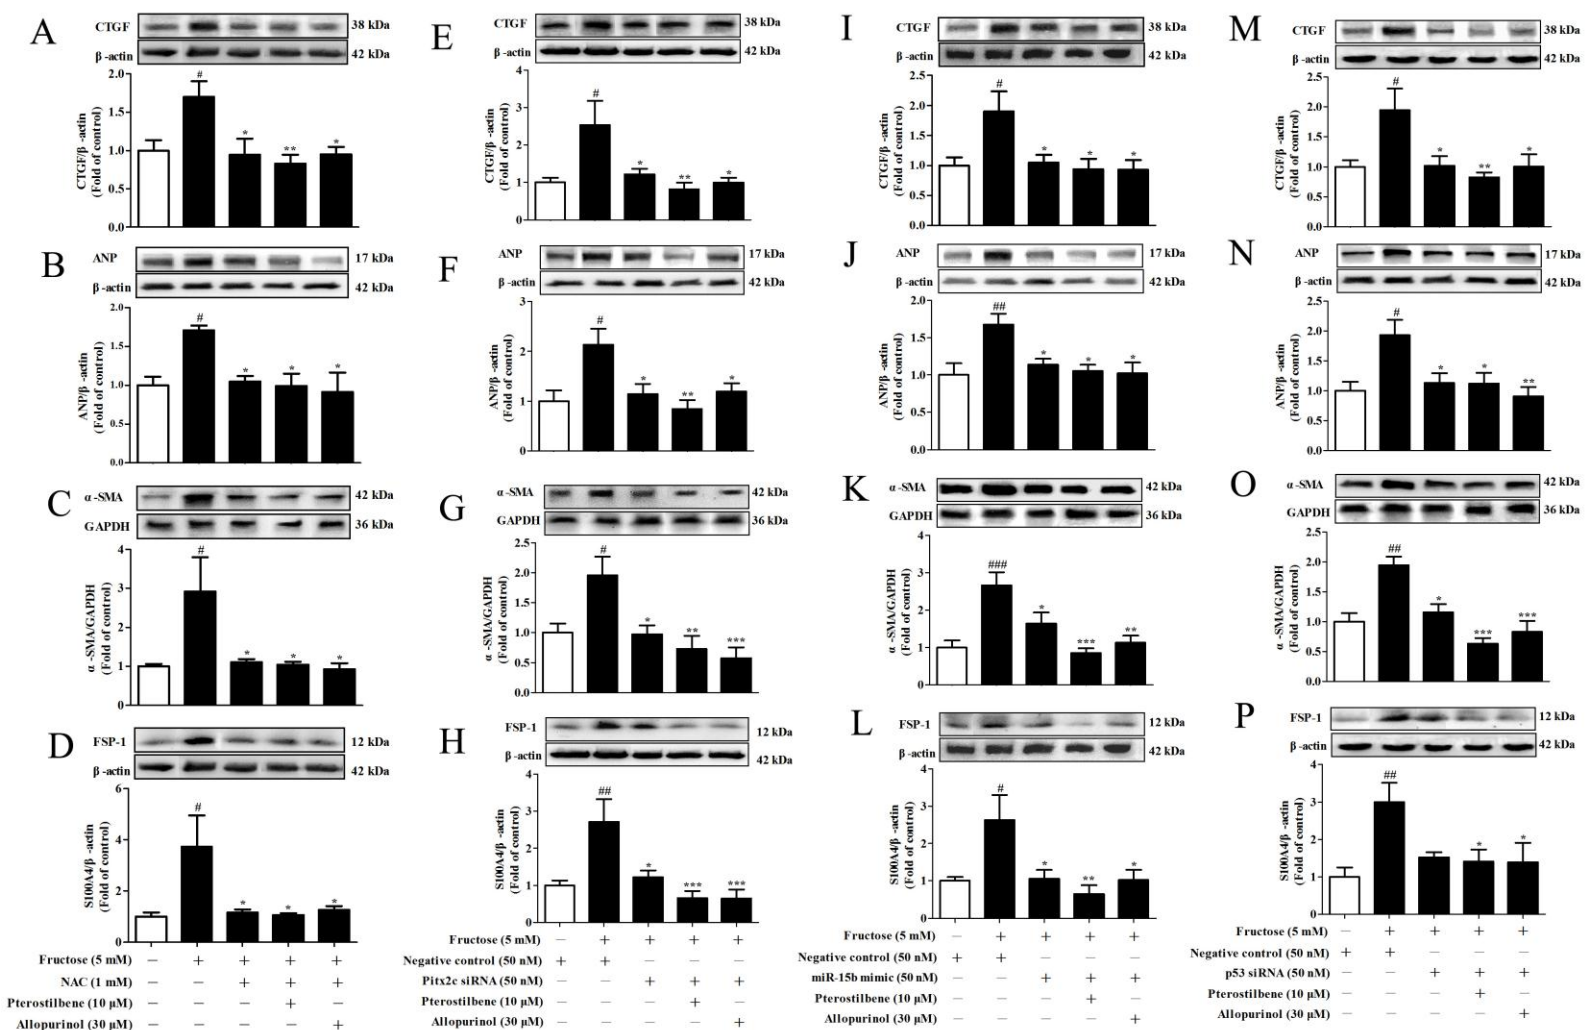



Figure S13

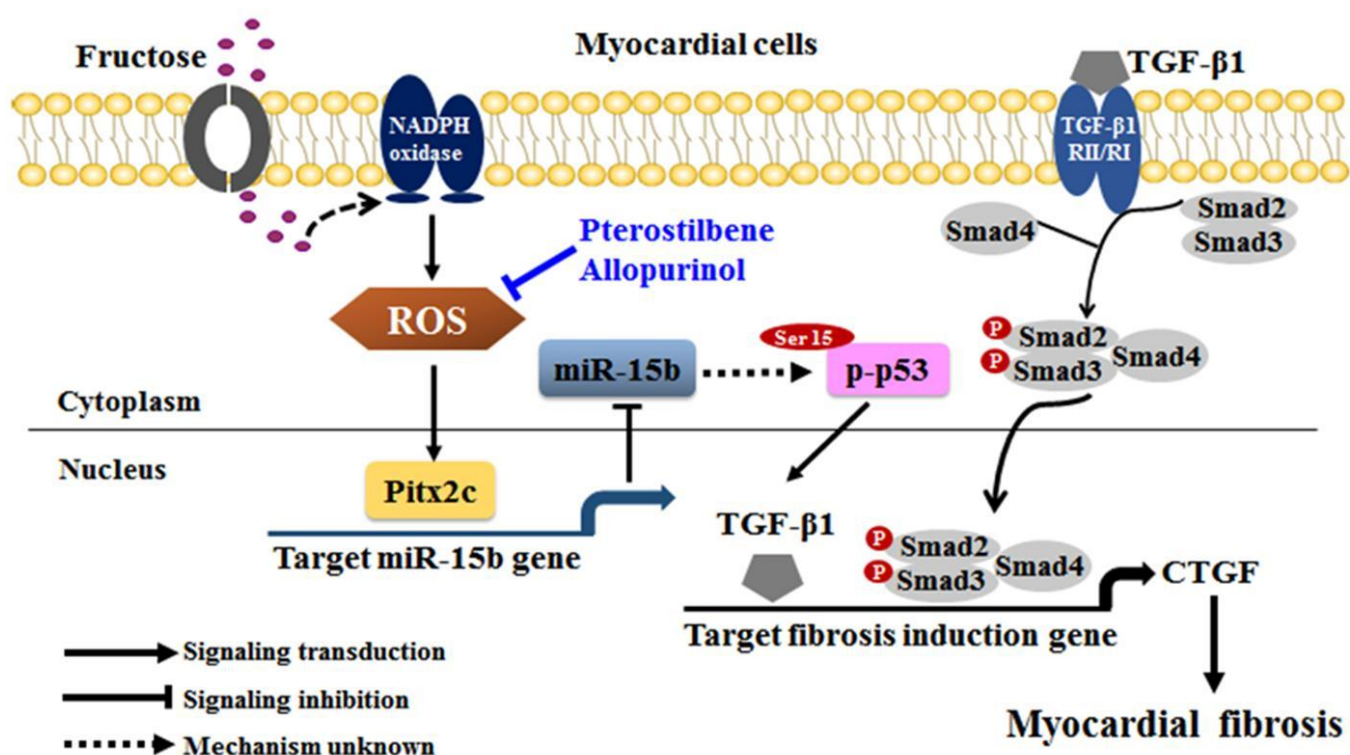

Supplement: f1 [file 1243215.f1.pdf]
